# Supplementary material
Source: publisher figshare collection journal article supplement (https://gsajournals.figshare.com/ndownloader/files/28169451)
Supplement: Supplementary file 1 [file 28169451]

## Sheet: Table S3
Table S4 The length and sequence of the a-factor pheromones
Species	Protein Length	Protein Sequence
C. orchidophilum	48	MEAVPECCKIKLKPKSSSDQSSLAKTDAIEPGQFGTHGVTVNACVIL*
C. graminicola	46	MDSVPSFCEIKMKPKSGTGGGATTAQKNTNQGDYGGATILGCVIL*
C. sublineola	46	MDSVPAYCEIKMKPKSGAWEAATPAQTNTNPGDYGGTTLLGCVIL*
C. falcatum	46	MDSVPAYYEIKMKPKSGTGEAAGTAQTNTNQGDYGGATILGCVIL*
C. incanum	46	MDSVAECCKITMKPKPGTEKPTVPTQMNTNPGDFGGATWVGCVIL*
C. tofieldiae	46	MDSVAECCKITMKPKPGAEKPAVPTKTNTNPGDFGGTTWVGCVIL*
C. higginsianum	46	MDSAPKCCKITTKSKSGAEEPTVPLQTNANPGYFGGASSHGCVIL*
C. shisoi	46	MDSAPKCCKMTTKSKSGAEEPTVPTQTNANPGYFGGASSHGCVIL*
C. tanaceti	46	MESAPNFCKITTKSKSGVEEPTVPTQTNASPGYFGGASSHGCVIL*
C. asianum	43	MIPCFELKIDLYTATDPSPSTQSNFGHSSHTSSATISACVVM*
C. fructicola	43	MIPCSELKIDLYTATDPSSSTQSNFGHSSHTSSATISACVVM*
C. gloeosporioides	43	MIPCSELKIDLYTATDPSSSTQSNFGHSSHTSSATISACVVM*
C. camelliae	43	MIPCSELKVDINTAKDPSPSTQSNFGHSSHTSSATISACVVM*
C. truncatum	42	MNSNSELQYSINLITKPNAAIQTNIGDGVTAGFATDTMCVVM*
C. karstii	42	MKRFPDIINVDTITDPGTTTQSNVGNAYGNSTATIGGCLVM*
C. sansevieriae	42	MSPFSEAKINVPTIADPNTSAQSSVVHNYNTPTSTVGACVVM*
C. musicola	109	MLPRLACSWETIEQLQTPSISHNLKEEQRYKLSSIACSAWDSTLQSHHHQHPAKETPPLNTTHRPNMDPTAEQNTNITATNNADPVSNVKSYTHWDKGGASFHGCLVM*
C. pluvivorum	109	MLPRLACSWETIEQLQTPSISHNLKEEQTYKLSSIACSAWDSTLQSHHHQHPAKETSPLDTTHRPNMDPTADQTTNIAATNNADPVSNVKSYTHWDKGGASFHGCLVM*
C. orbiculare	35	MTININYLSDPSMAPQAGIGGMTGGTTYHACVVM*
C. sidae	35	MTININYLSDPSMAPQAGIGGMTGGTTYHACVVM*
C. spinosum	35	MTININYLSDPSMAPQAGIGGMTGGTTYHACVVM*
C. trifolii	35	MTININYLSEPSMAPQAGIGGMTGGTTYHACVVM*
V. dahliae	67	MPSYTQKNGGGHSGCSIMKNGGGHSGCSIMKNGGGHSGCSIMKNGGGHSGCSVMKNGGGHSGCAIM*
V. tricorpus	67	MPSRAQKNGGGHSGCSVMKNGGGHSGCSVMKNGGGHSGCSVMKNGGGHSGCSVMKNGGGHSGCSVM*
